# Supplementary material for: Comparative diagnostic accuracy studies with an imperfect reference standard – a comparison of correction methods
Source: Springer Nature journal article supplement (doi:10.1186/s12874-021-01255-4), 2021-04-12
Supplement: MOESM2 [file 19058174]

**Comparative diagnostic accuracy studies with an imperfect reference standard – A  
comparison of correction methods**

Chinyereugo M. Umemneku Chikere<sup>1\*</sup>, Kevin J. Wilson<sup>2</sup>, A. Joy Allen<sup>3</sup>, Luke Vale<sup>1</sup>

<sup>1</sup> Population Health Science Institute, Faculty of Medical Sciences, Newcastle University

<sup>2</sup> School of Mathematics, Statistics and Physics, Newcastle University

<sup>3</sup> National Institute for Health Research, Newcastle In Vitro Diagnostics Co-operative,  
Newcastle University

\* Corresponding author

Email: [cmuc1@leicester.ac.uk](mailto:cmuc1@leicester.ac.uk) (CMUC)

## R-code employed to simulate the dataset, analyse generated dataset and clinical dataset

This section explains the R-Code employed to simulate the different datasets explored in this paper and to analyse the clinical datasets.

1. Calculate the cell probabilities for multinomial distribution using the fixed effect modelling approach<sup>1, 2</sup>

```
``{r cell probabilities}
proba<- function(pd,sRS,spRS, sIT, spIT, cova1, cova2){
#sRS and spRS are sensitivity and specificity of RS respectively
#sIT and spIT are sensitivity and specificity of IT respectively
#cova1 is the covariance term among the diseased group
#cova2 is the covariance term among the non-diseased group
#pd is the prevalence of the target condition
a<- pd*(sRS*sIT + cova1)+((1 -pd)*(1-spRS)*(1-spIT) + cova2)
c<- pd*(sRS*(1 - sIT) - cova1) + ((1 -pd)*( 1- spRS)*spIT + cova2)
b<- pd*((1 - sRS)*sIT - cova1) + ((1 -pd)*spRS*(1-spIT) + cova2)
d<- pd*((1 - sRS)*(1 - sIT) + cova1) + ((1 -pd)*spRS*spIT + cova2)
prom<- c(a, c, b, d)
return(prom)
}
``
```

2. Code employed to estimate the unadjusted and corrected sensitivity and specificity of the index test.

```
``{r fun1}
cal<- function(dtab, sRS, spRS){
#dtab is the 2 by 2 matrix simulated using the multinomial distribution and the cell
probability function (#1)
Np<- sum(dtab[1,1],dtab[1,2],dtab[2,1],dtab[2,2]) # total number of participants
e<- sum(dtab[1,1], dtab[2,1]) # a+c total RS positive
f<- sum(dtab[1,2], dtab[2,2]) # b+d total RS negative
g<- sum(dtab[1,1], dtab[1,2]) #a+b total IT positive
h<- sum(dtab[2,1], dtab[2,2]) # c+d # total IT negative
prev<- e/Np # sample prevalence
senIT <- dtab[1,1]/ e # unadjusted sensitivity of index test
specIT<- dtab[2,2]/f # unadjusted specificity of index test
senbre<- (prev*sRS*senIT + (1 - prev)*(1 - spRS)*(1 - specIT))/(prev*sRS + (1 -
prev)*(1 - spRS)) # Brenner corrected sensitivity
specbre<- (prev*(1 - sRS)*(1-senIT) + (1 - prev)*(spRS)*(specIT))/(prev*(1-sRS) + (1 -
prev)*spRS) # Brenner corrected specificity
senstaq<- (g*spRS - dtab[1,2])/ (Np*(spRS - 1) + e) # Staquet et al corrected sensitivity
}
```

```

specstaq<- (h*sRS - dtab[2,1])/(Np*sRS - e) # Staquet et al corrected specificity
estpre<- (prev + spRS - 1)/(sRS + spRS - 1) # estimated prevalence
result<- c(senIT, specIT, senbre, specbre, senstaq, specstaq, estpre, prev)
}
...

```

3. Code employed to estimate the covariance inequalities (boundary to decide the choice of covariance terms given that the index test and reference standard are conditionally dependent)

```

```{r covabound}
covabound<- function(sRS, spRS, sIT, spIT){
  lcovsen<- (-sRS * sIT) + max(0, sRS + sIT -1) #lower value for covariance among
diseased group
  ucovsen<- min(sRS,sIT) - (sRS * sIT) #upper value of covariance among the diseased
group
  lcovspec<- -spRS*spIT + max(0, spRS +spIT - 1) #lower value for covariance among
non – diseased group
  ucovaspec<- min(spRS,spIT) - (spRS * spIT) #upper value of covariance among the
diseased group
  return (cbind(c("lower sen", "upper sen", "lower spec", "upper spec"),c(lcovsen,
ucovsen, lcovspec, ucovaspec)))
}
...

```

4. Code to generate random samples of 2 by 2 tables under the assumption of conditional independence and conditional dependence using the possible covariance terms using the cell probabilities function.

```

```{r multinomial}
sim<- function(numb,n,pd,sRS,spRS, sIT, spIT, cova1, cova2){
  # n is the sample size (number of participants)
  # numb is the number of samples simulated with size n
  prom<- proba(pd,sRS,spRS, sIT, spIT, cova1, cova2)
  exp<- rmultinom(numb,n,prom)
  tab<- list()
  for(i in 1:numb){
    tab[[i]]<- matrix(exp[,i],2, 2)
  }
  return(tab)
}
...

```

### Example

```

set.seed(1235679)
exsim<- sim(1,100,0.9,1,1,0.8,0.7,0.05, 0.05)

```

5. Estimate the unadjusted and corrected sensitivity and specificity from number of samples simulated

```

```{r solve}
sol<- function(numb,n,pd,sRS,spRS, slT, spIT, cova1, cova2){
  tabu<- sim(numb, n, pd, sRS, spRS, slT, spIT, cova1, cova2)
  mat<- matrix(NA, numb, 8)
  for (i in 1:numb){
    mat[i,] <- cal(tabu[[i]], sRS,spRS)
  }
  colnames(mat) <- c("Unadjsen","Unadjspec", "Sen.Brenner", "Spec.Brenner",
"Sen.Staquet", "Spec.Staquet", "EstPre", "Sam.Prev")
  tabmat<- list(tabu, mat)
  return(tabmat)
}
...

## Example
set.seed(1235679)
sol(10, 50, 0.3, 0.9, 0.9, 0.8, 0.7, 0,0)[[2]][,1]

```

6. Obtain the mean values of estimates, standard deviation, mean square error (MSE) and bias.

```

#Call up the required packages in R
```{r call}
library(gstat)
library(e1071)
library(hydroGOF)
...

## Function to estimate the Mean, MSE, SD and bias of the unadjusted and corrected
sensitivity and specificity of index test
```{r descriptive}
desol<- function(numb,n,pd,sRS,spRS, slT, spIT, cova1, cova2){
  msol<- sol(numb,n,pd,sRS,spRS, slT, spIT, cova1, cova2)[[2]]
  msol1<- msol[!rowSums(!is.finite(msol)),]# remove rows with inf values or non- finite
values.
  msol2<- msol1[!rowSums(msol1 > 2),] # remove rows with any value above 2.
#Values above 1 or below 0 are obtained via the Staquet et al approach.
  mval<- apply(msol1, 2, mean)
  sval<- apply(msol1, 2, sd)
  new<- msol1
  numb1<- length(msol1[,1])

```

```

para<- cbind(rep(sIT, numb1),rep(spIT, numb1),rep(sIT, numb1), rep(spIT,
numb1),rep(sIT, numb1), rep(spIT, numb1),rep(pd, numb1),rep(pd, numb1))
msqerror<- mse(new, para)
realval<- c(sIT, spIT, sIT, spIT, sIT, spIT, pd, pd)
BiasEP<- abs(mval - realval)
MCerr<- sval/sqrt(numb)
tog<- cbind(mval,sval, msqerror, BiasEP, MCerr)
### returns only the mean value, standard deviation and MSE
return(tog)
}
...

##### Simulated examples
## Imperfect test RS better than IT, IT and RS are conditionally independent
```{r example1}
set.seed(1235679)
example0<- desol(200,50,0.3, 0.9, 0.9, 0.8, 0.7, 0.00, 0.00)
example1<- desol(200,80,0.3, 0.9, 0.9, 0.8, 0.7, 0.00, 0.00)
example2<- desol(200,100,0.3,0.9, 0.9, 0.8, 0.7, 0.00, 0.00)
example3<- desol(200,120,0.3, 0.9, 0.9, 0.8, 0.7, 0.00, 0.00)
example4<- desol(200,150,0.3, 0.9, 0.9, 0.8, 0.7, 0.00, 0.00)
example5<- desol(200,180,0.3, 0.9, 0.9, 0.8, 0.7, 0.00, 0.00)
example6<- desol(200,200,0.3, 0.9, 0.9, 0.8, 0.7, 0.00, 0.00)
example7<- desol(200,250,0.3, 0.9, 0.9, 0.8, 0.7, 0.00, 0.00)
example8<- desol(200,300,0.3, 0.9, 0.9, 0.8, 0.7, 0.00, 0.00)
example9<- desol(200,350,0.3, 0.9, 0.9, 0.8, 0.7, 0.00, 0.00)
example10<- desol(200,400,0.3, 0.9, 0.9, 0.8, 0.7, 0.00, 0.00)
example11<- desol(200,500,0.3, 0.9, 0.9, 0.8, 0.7, 0.00, 0.00)
example12<- desol(200,600,0.3, 0.9, 0.9, 0.8, 0.7, 0.00, 0.00)
example13<- desol(200,700,0.3, 0.9, 0.9, 0.8, 0.7, 0.00, 0.00)
example14<- desol(200,800,0.3, 0.9, 0.9, 0.8, 0.7, 0.00, 0.00)
example15<- desol(200,900,0.3, 0.9, 0.9, 0.8, 0.7, 0.00, 0.00)
example16<- desol(200,1000,0.3, 0.9, 0.9, 0.8, 0.7, 0.00, 0.00)
...

```{r example2}
### Imperfect test RS worse than IT, IT and RS are conditionally independent
set.seed(1235679)
example0<- desol(200,50,0.3, 0.8, 0.7,0.9, 0.9, 0.00, 0.00)
example1<- desol(200,80,0.3, 0.8, 0.7,0.9, 0.9, 0.00, 0.00)
example2<- desol(200,100,0.3,0.8, 0.7,0.9, 0.9, 0.00, 0.00)
example3<- desol(200,120,0.3, 0.8, 0.7, 0.9, 0.9, 0.00, 0.00)
example4<- desol(200,150,0.3, 0.8, 0.7, 0.9, 0.9, 0.00, 0.00)
example5<- desol(200,180,0.3,0.8, 0.7, 0.9, 0.9, 0.00, 0.00)
example6<- desol(200,200,0.3,0.8, 0.7, 0.9, 0.9, 0.00, 0.00)

```

```

example7<- desol(200,250,0.3, 0.8, 0.7, 0.9, 0.9, 0.00, 0.00)
example8<- desol(200,300,0.3, 0.8, 0.7, 0.9, 0.9, 0.00, 0.00)
example9<- desol(200,350,0.3, 0.8, 0.7, 0.9, 0.9, 0.00, 0.00)
example10<- desol(200,400,0.3, 0.8, 0.7, 0.9, 0.9, 0.00, 0.00)
example11<- desol(200,500,0.3, 0.8, 0.7, 0.9, 0.9, 0.00, 0.00)
example12<- desol(200,600,0.3,0.8, 0.7, 0.9, 0.9, 0.00, 0.00)
example13<- desol(200,700,0.3,0.8, 0.7, 0.9, 0.9, 0.00, 0.00)
example14<- desol(200,800,0.3, 0.8, 0.7,0.9, 0.9, 0.00, 0.00)
example15<- desol(200,900,0.3, 0.8, 0.7,0.9, 0.9, 0.00, 0.00)
example16<- desol(200,1000,0.3,0.8, 0.7, 0.9, 0.9, 0.00, 0.00)
...

```

```
## Put performance measures in a single data frame
```

```
``{r data1}
```

```

toptab<- cbind(example0[,2],example1[,2], example2[,2], example3[,2], example4[,2],
example5[,2], example6[,2], example7[,2], example8[,2], example9[,2], example10[,2],
example11[,2], example12[,2], example13[,2], example14[,2], example15[,2],
example16[,2])

```

```

samsize<- c(50, 80,100, 120, 150, 180, 200, 250, 300, 350, 400, 500, 600, 700, 800,
900, 1000)

```

```
ttab1<- t(toptab)
```

```
ttab<- ttab1[,1:6]
```

```

colnames(ttab)<- c("sdUnadjsen","sdUnadjspec", "sdSen.Brenner", "sdSpec.Brenner",
"sdSen.Staquet", "sdSpec.Staquet")

```

```

dimtab<- cbind(example0[,1],example1[,1], example2[,1], example3[,1], example4[,1],
example5[,1], example6[,1], example7[,1], example8[,1], example9[,1], example10[,1],
example11[,1], example12[,1], example13[,1], example14[,1], example15[,1],
example16[,1])

```

```
tdimtab1<- t(dimtab)
```

```
tdimtab<- tdimtab1[,1:6]
```

```

colnames(tdimtab)<- c("meanUnadjsen","meanUnadjspec", "meanSen.Brenner",
"meanSpec.Brenner", "meanSen.Staquet", "meanSpec.Staquet")

```

```

msqtab<- cbind(example0[,3],example1[,3], example2[,3], example3[,3], example4[,3],
example5[,3], example6[,3], example7[,3], example8[,3], example9[,3], example10[,3],
example11[,3], example12[,3], example13[,3], example14[,3], example15[,3],
example16[,3])

```

```
tmsqtab1<- t(msqtab)
```

```
tmsqtab<- tmsqtab1[,1:6]
```

```

colnames(tmsqtab)<- c("msqUnadjsen","msqUnadjspec", "msqSen.Brenner",
"msqSpec.Brenner", "msqSen.Staquet", "msqSpec.Staquet")

```

```

biastab<- cbind(example0[,4],example1[,4], example2[,4], example3[,4], example4[,4],
example5[,4], example6[,4], example7[,4], example8[,4], example9[,4], example10[,4],

```

```
example11[,4], example12[,4], example13[,4], example14[,4], example15[,4],  
example16[,4])
```

```
tbtabs1 <- t(biastabs)
```

```
tbtabs <- tbtabs1[,1:6]
```

```
colnames(tbtabs) <- c("biasUnadj", "biasUnadjspec", "biasSen.Brenner",  
"biasSpec.Brenner", "biasSen.Staquet", "biasSpec.Staquet")
```

```
MCerrtab <- cbind(example0[,5], example1[,5], example2[,5], example3[,5], example4[,5],  
example5[,5], example6[,5], example7[,5], example8[,5], example9[,5], example10[,5],  
example11[,5], example12[,5], example13[,5], example14[,5], example15[,5],  
example16[,5])
```

```
MCtab1 <- t(MCerrtab)
```

```
MCtab <- Mctab1[,1:6]
```

```
colnames(MCtab) <- c("MCerrUnadj", "MCerrUnadjspec", "MCerrSen.Brenner",  
"MCerrSpec.Brenner", "MCerrSen.Staquet", "MCerrSpec.Staquet")
```

```
samtab <- round(data.frame(samsize, ttab, tdimtab, tmsqtab, tbtabs, Mctab), 4)
```

```
...
```

Other possible variations or conditions can be explored by changing the values of the sensitivities and specificities of IT and or RS and prevalence.

7. Plot the unadjusted and corrected mean sensitivity and specificity of IT alongside the SD, Bias and MSE

```
## call up required R packages
```

```
```{r library}
```

```
library(dplyr)
```

```
library(tidyr)
```

```
library(ggplot2)
```

```
library(reshape2)
```

```
library(gridExtra)
```

```
...
```

```
##### plot performance measures against sample size
```

```
```{r plot2}
```

```
My_Theme = theme(axis.title.x = element_text(size = 16), axis.text.x = element_text(size  
= 14), axis.title.y = element_text(size = 16), axis.text.y = element_text(size = 14),  
legend.title = element_text(size = 12), legend.text = element_text(size = 12))
```

```
df <- melt(samtab[,c("samsize", "sdUnadj", "sdSen.Brenner", "sdSen.Staquet")],  
id = "samsize")
```

```
pg <- df # Copy data into new data frame
```

```
# Rename the column and the values in the factor
```

```
levels(pg$variable)[levels(pg$variable) == "sdUnadj"] <- "Unadjusted"
```

```
levels(pg$variable)[levels(pg$variable) == "sdSen.Brenner"] <- "Brenner"
```

```

levels(pg$variable)[levels(pg$variable)=="sdSen.Staquet"] <- "Staquet"
names(pg)[names(pg)=="variable"] <- "Standard.Error"

```

```

p<- ggplot(pg, aes(x=samsize, y=value, col= Standard.Error)) + geom_line() + labs(x
="Sample size", y = "SE sensitivity") + geom_line(size = 1) +
coord_cartesian(ylim=c(0.0,0.3))+ My_Theme
#+ geom_hline(yintercept=0.9, linetype="dashed", color = "yellow", size = 2)

```

```
##### specificity
```

```
df1 <- melt(samtab[,c("samsize", "sdUnadjspec", "sdSpec.Brenner", "sdSpec.Staquet")],
id="samsize")
```

```
pg1 <- df1 # Copy data into new data frame
```

```
# Rename the column and the values in the factor
```

```
levels(pg1$variable)[levels(pg1$variable)=="sdUnadjspec"] <- "Unadjusted"
```

```
levels(pg1$variable)[levels(pg1$variable)=="sdSpec.Brenner"] <- "Brenner"
```

```
levels(pg1$variable)[levels(pg1$variable)=="sdSpec.Staquet"] <- "Staquet"
```

```
names(pg1)[names(pg1)=="variable"] <- "Standard.Error"
```

```

p1<- ggplot(pg1, aes(x=samsize, y=value, col= Standard.Error)) + geom_line() + labs(x
="Sample size", y = "SE specificity") + geom_line(size = 1) +
coord_cartesian(ylim=c(0.0,0.07))+ My_Theme

```

```
#+ geom_hline(yintercept=0.9, linetype="dashed", color = "yellow", size = 2)
```

```
### put both plot as one
```

```
grid.arrange(p, p1, nrow=2)
```

```
...
```

## 8. Estimate the mean sensitivity and specificity of IT at varying prevalences

```
## Estimate only the mean sensitivity and specificity of IT
```

```
```{r meansol}
```

```
meansol<- function(numb,n,pd,sRS,spRS, sIT, spIT, cova1, cova2){
```

```
  msol<- sol(numb,n,pd,sRS,spRS, sIT, spIT, cova1, cova2)[[2]]
```

```
  msol1<- msol[!rowSums(!is.finite(msol)),]# remove rows with inf values or non- finite
values.
```

```
  msol2<- msol1[!rowSums(msol1 > 2),] # exclude rows greater than 2
```

```
  msol3<- msol2[!rowSums(msol2 < 0),] #exclude rows less than zero
```

```
  meanval<- apply(msol3, 2, mean)
```

```
  return(meanval)
```

```
}
```

```
...
```

```
## Code that estimates the mean values of the estimator at different prevalence
```

```
```{r soldiff}
```

```
soldiff<- function (z,numb,n,sRS,spRS, sIT, spIT, cova1, cova2){
```



```

pd<- seq(0.00, 1, length.out = z)
top<- list()
for(i in 1:z){
  top[[i]]<- meansol(numb,n,pd[i],sRS,spRS,sIT,spIT, cova1, cova2)
}
tim<- matrix(NA,z, 8)
for(i in 1:z){
  tim[i,]<- top[[i]]
}
ss<- rep(n, z)
colnames(tim) <- c("Unadjsen","Unadjspec", "Sen.Brenner", "Spec.Brenner",
"Sen.Staquet", "Spec.Staquet", "EstPre", "Sam.Prev")
timpd<- cbind(pd, tim,ss)#data.frame
return(timpd)
}
...

### Simulate 1000 participants, 200 multiple samples, 100 prevelances. RS is better
than IT and RS is imperfect
```{r data}
set.seed(1235679)
preout<- soldiff(100,200,1000, 0.9, 0.9, 0.8, 0.8, 0.00, 0.00)
preout<- data.frame(preout)
...

##### plot the mean sensitivity and specificity
```{r plot2}
My_Theme = theme(axis.title.x = element_text(size = 16),axis.text.x = element_text(size
= 14),axis.title.y = element_text(size = 16), axis.text.y = element_text(size = 14),
legend.title=element_text(size=12),legend.text=element_text(size=12))

df <- melt(preout[,c("pd","Unadjsen", "Sen.Brenner", "Sen.Staquet")], id="pd")
pg <- df # Copy data into new data frame
# Rename the column and the values in the factor
levels(pg$variable)[levels(pg$variable)=="Unadjsen"] <- "Unadjusted"
levels(pg$variable)[levels(pg$variable)=="Sen.Brenner"] <- "Brenner"
levels(pg$variable)[levels(pg$variable)=="Sen.Staquet"] <- "Staquet"
names(pg)[names(pg)=="variable"] <- "Mean"

p<- ggplot(pg, aes(x=pd, y=value, col= Mean)) + geom_line()+ geom_point() + labs(x
="Prevelance", y = "Mean sensitivity") + geom_line(size = 1) +
coord_cartesian(ylim=c(0.2,1))+ My_Theme + geom_hline(yintercept=0.8,
linetype="dashed", color = "yellow", size = 2)

##### specificity

```

```

df1 <- melt(preout[,c("pd", "Unadjspec", "Spec.Brenner", "Spec.Staquet")], id="pd")
pg1 <- df1 # Copy data into new data frame
# Rename the column and the values in the factor
levels(pg1$variable)[levels(pg1$variable)=="Unadjspec"] <- "Unadjusted"
levels(pg1$variable)[levels(pg1$variable)=="Spec.Brenner"] <- "Brenner"
levels(pg1$variable)[levels(pg1$variable)=="Spec.Staquet"] <- "Staquet"
names(pg1)[names(pg1)=="variable"] <- "Mean"

p1<- ggplot(pg1, aes(x=pd, y=value, col= Mean)) + geom_line() + geom_point() + labs(x
="Prevalance", y = "Mean specificity") + geom_line(size = 1) +
coord_cartesian(ylim=c(0.4,1.2))+ My_Theme + geom_hline(yintercept=0.8,
linetype="dashed", color = "yellow", size = 2)

### put both plot as one
grid.arrange(p, p1, nrow=2)
```

```

9. Estimate the mean corrected and unadjusted sensitivity and specificity of IT assuming sensitivity of RS (or specificity of RS) varies from 0 to 1. Unlike the function in 6 and 8 above the sensitivity of RS and IT, and the specificity of RS and IT are fixed. This allows more possible combinations to examine how the corrections method perform.

```

#### estimate mean sensitivity and specificity by fixing one of these parameters – sRS,
spRS, sIT, spIT- and varying the others
```{r soldiff1}
soldiff1<- function (z,pd,numb,n,sRS, spRS, sIT, cova1, cova2){
##in this stated function the spIT is varied and the others are fixed
## to vary another parameter change it appropriately
  splT<- seq(0, 1, length.out = z)
  top<- list()
  for(i in 1:z){
    top[[i]]<- meansol(numb,n,pd,sRS,spRS,sIT,splT[i], cova1, cova2)
  }
  tim<- matrix(NA,z, 8)
  for(i in 1:z){
    tim[i,]<- top[[i]]
  }
  ss<- rep(n, z)
  colnames(tim) <- c("Unadjsen", "Unadjspec", "Sen.Brenner", "Spec.Brenner",
"Sen.Staquet", "Spec.Staquet", "EstPre", "Sam.Prev")
  timpd<- cbind(splT, tim,ss)#data.frame
  return(timpd)
}
```

```

```

### explore 1000 participants, 200 multiple samples
```{r explore}
set.seed(1235679)
preout<- soldiff(100,0.3,200,1000, 0.9, 0.9, 0.8, 0.00, 0.00)
preout<- data.frame(preout)
```

##### plot mean sensitivity and specificity
```{r plot2}
My_Theme = theme(axis.title.x = element_text(size = 16),axis.text.x = element_text(size
= 14),axis.title.y = element_text(size = 16), axis.text.y = element_text(size = 14),
legend.title=element_text(size=12),legend.text=element_text(size=12))

df <- melt(preout[,c("spIT", "Unadjsen", "Sen.Brenner", "Sen.Staquet")], id="spIT")
pg <- df # Copy data into new data frame
# Rename the column and the values in the factor
levels(pg$variable)[levels(pg$variable)=="Unadjsen"] <- "Unadjusted"
levels(pg$variable)[levels(pg$variable)=="Sen.Brenner"] <- "Brenner"
levels(pg$variable)[levels(pg$variable)=="Sen.Staquet"] <- "Staquet"
names(pg)[names(pg)=="variable"] <- "Mean"

p<- ggplot(pg, aes(x=spIT, y=value, col= Mean)) + geom_line()+ geom_point() + labs(x
="Specificity IT", y = "Mean sensitivity") + geom_line(size = 1) +
coord_cartesian(ylim=c(0.4,1))+ My_Theme + geom_hline(yintercept=0.8,
linetype="dashed", color = "yellow", size = 2)

##### specificity
df1 <- melt(preout[,c("spIT", "Unadjspec", "Spec.Brenner", "Spec.Staquet")], id="spIT")
pg1 <- df1 # Copy data into new data frame
# Rename the column and the values in the factor
levels(pg1$variable)[levels(pg1$variable)=="Unadjspec"] <- "Unadjusted"
levels(pg1$variable)[levels(pg1$variable)=="Spec.Brenner"] <- "Brenner"
levels(pg1$variable)[levels(pg1$variable)=="Spec.Staquet"] <- "Staquet"
names(pg1)[names(pg1)=="variable"] <- "Mean"

p1<- ggplot(pg1, aes(x=spIT, y=value, col= Mean)) + geom_line() + geom_point() + labs(x
="Specificity IT", y = "Mean specificity") + geom_line(size = 1) +
coord_cartesian(ylim=c(0,1))+ My_Theme +geom_abline(intercept = 0,slope = 1,
color="yellow", linetype="dashed", size=2)
#+ geom_hline(yintercept=0.8, linetype="dashed", color = "yellow", size = 2)

### put both plot as one
grid.arrange(p, p1, nrow=2)
```

```

10. Code to estimate the sensitivity and specificity of IT which include the Brenner second estimators for positively correlated IT and RS. This pair of estimators is explored in Appendix File 4.

```

```{r Brenner positive fun}
calpos<- function(dtab, sRS, spRS){
Np<- sum(dtab[1,1],dtab[1,2],dtab[2,1],dtab[2,2]) # total number of participants
e<- sum(dtab[1,1], dtab[2,1]) # a+c total RS positive
f<- sum(dtab[1,2], dtab[2,2]) # b+d total RS negative
g<- sum(dtab[1,1], dtab[1,2]) #a+b total IT positive
h<- sum(dtab[2,1], dtab[2,2]) # c+d # total IT negative
prev<- e/Np # prevalence of the diseased in sample of study
senIT <- dtab[1,1]/ e # sensitivity of index test unadjusted
specIT<- dtab[2,2]/f # specificity of index test unadjusted
senpos<- (prev * senIT +(1 - prev)*(1 - spRS))/(prev*sRS + (1 - prev)*(1 - spRS)) #
corrected sensitivity of IT using the positively correlated pair of estimator by Brenner
specpos<- (prev * ( 1 - sRS) +(1 - prev)*specIT)/(prev*( 1 - sRS) + (1 - prev)*spRS) #
corrected sensitivity of IT using the positively correlated pair of estimator by Brenner
senbre<- (prev*sRS*senIT + (1 - prev)*(1 - spRS)*(1 - specIT))/(prev*sRS + (1 -
prev)*(1 - spRS))
specbre<- (prev*(1 - sRS)*(1-senIT) + (1 - prev)*(spRS)*(specIT))/(prev*(1-sRS) + (1 -
prev)*spRS)
senstaq<- (g*spRS - dtab[1,2])/ (Np*(spRS - 1) + e)
specstaq<- (h*sRS - dtab[2,1])/(Np*sRS - e)
estpre<- (prev + spRS - 1)/(sRS + spRS - 1)
return( c(senpos, specpos, senIT, specIT, senbre, specbre, senstaq, specstaq))
}
...

```

### Code to generate random samples of estimate the mean values

```

```{r Brenner positive}
solpos<- function(numb,n,pd,sRS,spRS, slT, splT, cova1, cova2){
tabu<- sim(numb, n, pd, sRS, spRS, slT, splT, cova1, cova2)
mat<- matrix(NA, numb, 8)
for (i in 1:numb){
mat[i,] <- calpos(tabu[[i]], sRS,spRS)
}
colnames(mat) <- c("Sen.pos.Bre", "Spec.pos.Bre", "Unadjsen",
"UnadjSpec","Sen.Brenner","Spec.Brenner","Sen.Staquet", "Spec.Staquet")
meanmat<- apply(mat, 2, mean)
#tabmat<- list(tabu, mat)
return(meanmat)
}
...

```

## Code to estimate the mean values at different prevalences and result

```

```{r soldiff}
solposdiff<- function (z,numb,n,sRS,spRS, sIT, spIT, cova1, cova2){
  pd<- seq(0, 1, length.out = z)
  top<- list()
  for(i in 1:z){
    top[[i]]<- solpos(numb,n,pd[i],sRS,spRS,sIT,spIT, cova1, cova2)
  }
  ss<- rep(n, z)
  tim<- matrix(NA,z, 8)
  for(i in 1:z){
    tim[i,]<- top[[i]]
  }
  colnames(tim) <- c("Sen.pos.Bre", "Spec.pos.Bre", "Unadjsen",
"UnadjSpec","Sen.Brenner", "Spec.Brenner","Sen.Staquet", "Spec.Staquet")
  timpd<- data.frame(pd, tim, ss)
  return(timpd)
}
```

```

#### simulate dataset with IT and RS conditionally dependent and covariance terms among the disease and non-diseased group are 0.05.

```

```{r solposdiff}
set.seed(1235679)
preout<- solposdiff(100,200,1000,0.9,0.9,0.8,0.8,0.05,0.05)
preout<- data.frame(preout)
```

```

### plot the mean values against the prevalences

```

```{r plot2}
My_Theme = theme(axis.title.x = element_text(size = 16),axis.text.x = element_text(size
= 14),axis.title.y = element_text(size = 16), axis.text.y = element_text(size = 14),
legend.title=element_text(size=12),legend.text=element_text(size=12))

df <- melt(preout[,c("pd","Unadjsen", "Sen.Brenner", "Sen.Staquet", "Sen.pos.Bre")],
id="pd")
pg <- df # Copy data into new data frame
# Rename the column and the values in the factor
levels(pg$variable)[levels(pg$variable)=="Unadjsen"] <- "Unadjusted"
levels(pg$variable)[levels(pg$variable)=="Sen.Brenner"] <- "Brenner"
levels(pg$variable)[levels(pg$variable)=="Sen.Staquet"] <- "Staquet"
levels(pg$variable)[levels(pg$variable)=="Sen.pos.Bre"] <- "BrennerPos"
names(pg)[names(pg)=="variable"] <- "Mean"

```

```
p<- ggplot(pg, aes(x=pd, y=value, col= Mean)) + geom_line()+ geom_point() + labs(x
="Prevalance", y = "Mean sensitivity") + geom_line(size = 1) +
coord_cartesian(ylim=c(0.0,1))+ My_Theme + geom_hline(yintercept=0.8,
linetype="dashed", color = "yellow", size = 2)
```

```
##### specificity
```

```
df1 <- melt(preout[,c("pd", "UnadjSpec", "Spec.Brenner", "Spec.Staquet",
"Spec.pos.Bre")], id="pd")
```

```
pg1 <- df1 # Copy data into new data frame
```

```
# Rename the column and the values in the factor
```

```
levels(pg1$variable)[levels(pg1$variable)=="UnadjSpec"] <- "Unadjusted"
```

```
levels(pg1$variable)[levels(pg1$variable)=="Spec.Brenner"] <- "Brenner"
```

```
levels(pg1$variable)[levels(pg1$variable)=="Spec.Staquet"] <- "Staquet"
```

```
levels(pg1$variable)[levels(pg1$variable)=="Spec.pos.Bre"] <- "BrennerPos"
```

```
names(pg1)[names(pg1)=="variable"] <- "Mean"
```

```
p1<- ggplot(pg1, aes(x=pd, y=value, col= Mean)) + geom_line() + geom_point() + labs(x
="Prevalance", y = "Mean specificity") + geom_line(size = 1) +
coord_cartesian(ylim=c(0.0,1))+ My_Theme + geom_hline(yintercept=0.8,
linetype="dashed", color = "yellow", size = 2)
```

```
### put both plot as one
```

```
grid.arrange(p, p1, nrow=2)
```

```
...
```

## 11. Calculate the sensitivity and specificity of the clinical dataset

```
```{r clinical1}
```

```
### use the cal function and put the sRS and spRS appropriately.
```

```
## Matos et al NC dataset
```

```
tabLF1<- matrix(c(241, 110,6,26), 2, 2) # matrix for LFpen
```

```
tabFC1<- matrix(c(156, 195,2,30), 2, 2) # matrix for FC
```

```
tiLF1<- cal(tabLF1, 0.796,0.799) # estimates for LFpen
```

```
tiFC1<- cal(tabFC1, 0.796,0.799) # estimates for FC
```

```
tiLF1
```

```
tiFC1
```

```
...
```

```
## D3 classification
```

```
```{r clinical2}
```

```
tabLF1<- matrix(c(20, 1,45,341), 2, 2) # matrix for LFpen
```

```
tabFC1<- matrix(c(21, 0,38,348), 2, 2) # matrix for FC
```

```
tiLF1<- cal(tabLF1, 0.786, 0.995) # estimates for LFpen
```

```
tiFC1<- cal(tabFC1, 0.786, 0.995) # estimates for FC
```

```
tiLF1
```

tiFC1

...

12. Calculate the 95% confidence interval of clinical dataset using the Wilson score interval

```
# Code Wilson score interval
```

```
```{r wilson}
```

```
wilfun<- function(p, n){  
  z<- qnorm(1-0.05/2)  
  rt<- 1/(1 + (z^2 /n))  
  rt1<- p + (z^2/(2*n))  
  rtp<- rt*rt1  
  vart<- ((p*(1 - p))/n) + ((z^2)/(4*(n^2)))  
  zvar<- (z/(1 + ((z^2)/n))) * sqrt(vart)  
  LL<- rtp-zvar  
  UL<- rtp+zvar  
  return(c(LL, UL))  
}  
...
```

```
## calculate 95%CI Mathew dataset
```

```
```{r cal}
```

```
wilsu<- wilfun(0.65, 62) # sensitivity unadjusted  
wilsb<- wilfun(0.5,62 ) # Brenner corrected sensitivity  
wilss<- wilfun(0.89,62)# Staquet corrected sensitivity  
wilpu<- wilfun(0.89, 199)# unadjusted specificity  
wilpb<- wilfun(0.85, 199) # Brenner corrected specificity  
wilps<- wilfun(0.96, 199) # Staquet et al corrected specificity  
wilsu  
wilsb  
wilss  
wilpu  
wilpb  
wilps  
...
```

```
## calculate 95% CI of the sensitivity of LFpen for NC detection
```

```
```{r cal}
```

```
wilu<- se(351, 32, 0.81, 0.69)  
wilb<- se(351, 32,0.44, 0.68)  
wils<- se(351, 32, 0.04, 0.70)  
wilu  
wilb  
wils
```

```
...
```

```
## calculate 95% CI of the sensitivity of FC for NC detection
```

```
``{r cal}
```

```
wilu<- se(351, 32, 0.91, 0.44)
```

```
wilb<- se(351, 32, 0.65, 0.44)
```

```
wils<- se(351, 32, 0.36, 0.45)
```

```
wilu
```

```
wilb
```

```
wils
```

```
...
```

```
### calculate the 95% CI for unadjusted specificity FC- D3 dataset
```

```
``{r test}
```

```
install.packages("DescTools")
```

```
library("DescTools")
```

```
BinomCI(348, 386, 0.95, sides = "two.sided", method = "wilson")
```



## References

1. Wang Z, Dendukuri N, Zar HJ, et al. Modeling conditional dependence among multiple diagnostic tests. *Statistics in medicine* 2017; 36: 4843-4859.
2. Vacek PM. The effect of conditional dependence on the evaluation of diagnostic tests. *Biometrics* 1985; 41: 959-968.
